# Supplementary material for: The alternate AP-1 adaptor subunit Apm2 interacts with the Mil1 regulatory protein and confers differential cargo sorting
Source: PubMed Central journal article supplement — Mol Biol Cell. 2016 Feb 1;27(3):588–98. doi: 10.1091/mbc.E15-09-0621 (PMC4751606; doi:10.1091/mbc.e15-09-0621), 2016-02-01

# Supplemental Materials

*Molecular Biology of the Cell*

Whitfield et al.

**Supplementary Table 1.** Yeast strains used in this work

| <b>Strain ID</b> | <b>Genotype</b>                                                                                              | <b>Source</b>          |
|------------------|--------------------------------------------------------------------------------------------------------------|------------------------|
| PJ694a           | <i>MATa trp1-901 leu2Δ-3 ura3Δ-52 his3Δ-200 gal4Δ gal80Δ<br/>LYS::GAL1::HIS3 GAL2::ADE-2 met2::GAL7-lacz</i> | A.Merz (U. Washington) |
| PJ694α           | <i>MATα trp1Δ-901 leu2Δ-3 ura3Δ-52 his3Δ-200 gal4Δ gal80Δ<br/>LYS::GAL1-HIS3 GAL2-ADE-2 met2::GAL7-lacz</i>  | A. Merz                |
| BY4742           | <i>MATα his3Δ1 leu2Δ0 lys2Δ0 ura3Δ0</i>                                                                      | GE Dharmacon           |
| MDY122           | BY4742 <i>chs6Δ::NAT</i>                                                                                     | This study             |
| MDY869           | BY4742 <i>chs6Δ::NAT apl2Δ::KANR</i>                                                                         | This study             |
| MDY784           | BY4742 <i>chs6Δ::NAT apl2Δ::HPH</i>                                                                          | This study             |
| MDY783           | BY4742 <i>chs6Δ::NAT apm1Δ::KANR</i>                                                                         | This study             |
| MDY786           | BY4742 <i>chs6Δ::NAT apm2Δ::KANR</i>                                                                         | This study             |
| CTY234           | BY4742 <i>can1Δ::STE2pr::LEU2 lyp1Δ::cyh2</i>                                                                | C. Boone (U. Toronto)  |
| BY4741           | <i>MATα HIS3Δ1; leu2Δ0; met15Δ0; ura3Δ0</i>                                                                  | GE Dharmacon           |
| SWY85            | BY4741 <i>apl2Δ::KANR</i>                                                                                    | This study             |
| SWY89            | BY4741 <i>apm1Δ::KANR</i>                                                                                    | This study             |
| SWY91            | BY4741 <i>apm2Δ::KANR</i>                                                                                    | This study             |
| SWY97            | BY4741 <i>mil1Δ::KANR</i>                                                                                    | This study             |
| HBY577           | BY4741 <i>suc2Δ::GFP-SNC1-SUC2::URA3</i>                                                                     | This study             |
| HBY573           | BY4741 <i>apm1Δ::KANR suc2Δ::GFP-SNC1-SUC2::URA3</i>                                                         | This study             |
| HBY574           | BY4741 <i>aps1Δ::KANR suc2Δ::GFP-SNC1-SUC2::URA3</i>                                                         | This study             |
| HBY575           | BY4741 <i>apm2Δ::KANR suc2Δ::GFP-SNC1-SUC2::URA3</i>                                                         | This study             |
| HBY576           | BY4741 <i>apl4Δ::KANR suc2Δ::GFP-SNC1-SUC2::URA3</i>                                                         | This study             |
| HBY571           | BY4741 <i>mil1Δ::KANR suc2Δ::GFP-SNC1-SUC2::URA3</i>                                                         | This study             |
| MDY613           | <i>yap1801Δ::KANR yap1802-3HA::HIS3 suc2Δ::GFP-SNC1-SUC2::URA3</i>                                           | This study             |
| LC1979           | BY4741 <i>APM4-GFP+::HIS3 CLC1-RFP::NAT</i>                                                                  | This study             |
| HBY155           | BY4741 <i>APM4-GFP+::HIS3 CLC1-RFP::NAT<br/>sla2Δ::URA3</i>                                                  |                        |
| LC1977           | BY4741 <i>APM2-GFP+::HIS3 CLC1-RFP::NAT</i>                                                                  | This study             |
| LC1978           | BY4741 <i>APM2-GFP+::HIS3 CLC1-RFP::NAT<br/>sla2Δ::URA3</i>                                                  |                        |
| CTY301           | BY4741 <i>MIL1-GFP+::HIS3</i>                                                                                | This study             |
| CTY564           | BY4741 <i>MIL1-GFP+::HIS3 APL4-3HA::KANR</i>                                                                 | This study             |
| CTY574           | BY4741 <i>MIL1-GFP+::HIS3 APL4Aear-3HA::KANR</i>                                                             | This study             |
| CTY265           | BY4741 <i>MIL1-GFP+::HIS3 APM1-3HA::KANR</i>                                                                 | This study             |
| CTY661           | BY4741 <i>MIL1-GFP+::HIS3 APM2-3HA::KANR</i>                                                                 | This study             |
| MDY1114          | BY4741 <i>APM2-GFP(envy)::HIS3</i>                                                                           | This study             |
| MDY1133          | BY4741 <i>APM2-GFP(envy)::HIS3 APM1::tdTomato::NAT</i>                                                       | This study             |
| MDY1136          | BY4741 <i>APM2-GFP(envy)::HIS3 ANP1-mRFPI.5::NAT</i>                                                         | This study             |
| SWY310           | BY4741 <i>APM2-GFP(envy)::HIS3 mil1Δ::KANR</i>                                                               | This study             |
| MDY1153          | BY4741 <i>MIL1-GFP(envy)::HIS3</i>                                                                           | This study             |

|         |                                                |            |
|---------|------------------------------------------------|------------|
| MDY1155 | BY4741 <i>MIL1-GFP(envy)::HIS3 apm2Δ::KANR</i> | This study |
| CTY157  | BY4741 <i>APM1-3HA::KANR</i>                   | This study |
| HBY567  | BY4741 <i>APM2-3HA::HIS3</i>                   | This study |
| CTY15   | BY4741 <i>APM1-GFP+</i>                        | This study |
| CTY416  | BY4741 <i>APM1-GFP+mil1Δ::NAT</i>              | This study |

**Supplementary Table 2.** Plasmids used in this work

| <b>Plasmid ID</b> | <b>Description</b>                                  | <b>Source</b>                          |
|-------------------|-----------------------------------------------------|----------------------------------------|
| pCS10             | pSNF7-RFP1.5::URA (CEN)                             | This study                             |
| pSec7-dsRed       | pSEC7-dsRed::URA3 (CEN)                             | S. Ferro-Novick (UCSD)                 |
| pRS415            | pLEU2 (CEN)                                         | Sikorski and Hieter (1989)*            |
| pHFR80            | pSNA2pr-SNA2(Y75A)-GFP-DXE::URA (CEN)               | P. Morsomme (U. Catholique de Louvain) |
| pNR36             | pHPH (CEN)                                          | This study                             |
| pNR32             | pAPM1::HPH (CEN)                                    | This study                             |
| pMD177            | pAPM1(F179A D181S)::HPH (CEN)                       | This study                             |
| pSW50             | pAPM1(F179A D181S)-GFP+::HIS3::HPH (CEN)            | This study                             |
| pMD178            | pAPM2(F273A D275S)::HPH (CEN)                       | This study                             |
| pSW48             | pAPM1pr-APM2-GFP+::HIS3::HPH (CEN)                  | This study                             |
| pSW60             | pAPM1pr-APM2-3HA::HIS3::HPH (CEN)                   | This study                             |
| pNR39             | pAPM1pr-APM2 <sup>YR</sup> -GFP+::HIS3::HPH (CEN)   | This study                             |
| pLC2632           | pMIL1::LEU2 (CEN)                                   | This study                             |
| pLC1922           | pMIL1-GFP+::HIS3::LEU2 (CEN)                        | This study                             |
| pLC2633           | pMIL1(S759A)::LEU2 (CEN)                            | This study                             |
| pLC1912           | pMIL1(D817A)::LEU2 (CEN)                            | This study                             |
| pLC1914           | pMIL1(H858A)::LEU2 (CEN)                            | This study                             |
| pLC2604           | pMIL1(W <sup>143</sup> QEMP)::LEU2 (CEN)            | This study                             |
| pLC2646           | pMIL1(W <sup>143</sup> QEMP)-GFP+::HIS3::LEU2 (CEN) | This study                             |
| pLC2605           | pMIL1(F <sup>152</sup> NIY)::LEU2 (CEN)             | This study                             |
| pMD158            | pMIL1::HPH (CEN)                                    | This study                             |
| pMD159            | pMIL1(S759A)::HPH (CEN)                             | This study                             |
| pMD157            | pMIL1(W <sup>143</sup> QEMP)::HPH (CEN)             | This study                             |
| pGBDU-C2          | pGBDU-C2::URA3 (2μ)                                 | P. James (U. Wisconsin)                |
| pCT11             | pGBDU-C2-APL4::URA3 (2μ)                            | This study                             |
| pLC2643           | pGBD-APM1::URA3 (2μ)                                | This study                             |
| pNR15             | pGBDU-C2-APM2::URA3 (2μ)                            | This study                             |
| pNR16             | pGBDU-C2-APM2(1-246)::URA3 (2μ)                     | This study                             |
| pNR18             | pGBDU-C2-APM2(247-605)::URA3 (2μ)                   | This study                             |
| pNR19             | pGBDU-C2-APM2(389-562)::URA3 (2μ)                   | This study                             |
| pGAD-C2           | pGAD-C2::LEU2 (2μ)                                  | P. James                               |
| pCT15             | pGAD-C2-APL4::LEU2 (2μ)                             | This study                             |
| pNR10             | pGAD-C2-MIL1::LEU2 (2μ)                             | This study                             |
| pNR11             | pGAD-C2-MIL1(1-450)::LEU2 (2μ)                      | This study                             |
| pLC2590           | pGAD-MIL1(125-175)::LEU2 (2μ)                       | This study                             |
| pLC2644           | pGAD-MIL1(125-175,                                  | This study                             |



pLC2645

W<sup>143</sup>QEMP>AAEAA)::LEU2 (2μ)

pGAD-MIL1(125-175, F<sup>152</sup>NIY>ANAA)::LEU2  
(2μ)

This study

\*Sikorski, R.S., and Hieter, P. (1989). A system of shuttle vectors and yeast host strains designed for efficient manipulation of DNA in *Saccharomyces cerevisiae*. *Genetics* 122, 19–27.

**Supplementary Figure 1.** The tyrosine-binding pockets of Apm1 and Apm2 are highly conserved, and mutation of residues in these pockets does not destabilize the proteins. (A) MUSCLE sequence alignment of Apm1- and Apm2-related sequences, showing conservation of the two tyrosine-binding pockets. Intensity of blue-highlighted residues corresponds to percent identity. Red-highlighted residues interact with the YxxΦ sorting signal. (B) Cellular levels of mutant and overexpressed forms of Apm1 and Apm2. The levels of genomically-tagged Apm1-GFP and Apm2-GFP were compared with plasmid-borne GFP-tagged Apm1<sup>tyr</sup>, and either Apm2<sup>tyr</sup>-GFP or Apm2<sup>OE</sup>-GFP expressed from the *APM1* promoter. Samples were resolved by 10% SDS-PAGE on the same gel and detected by immunoblotting. PGK levels are shown as loading control. White gaps between panels indicate cropping of empty lanes from the same blot.

**Supplementary Figure 2.** Deletion of *MILI* does not affect Apm1-GFP recruitment or number of Golgi compartments. (A) Localization of Apm1-GFP in wild type or *mili* mutant strains quantified in a single slice. No significant differences between the means were found (unpaired t-test with wild-type). Error bars represent standard error of the mean (n=3). (B) Number of Sec7-dsRed puncta expressed as mean/cell. No significant differences between the means were found (unpaired t-tests with wild types). Error bars represent standard error of the mean (n=3).

A

*S\_cerevisiae\_Apm 2* 251 AKTIIMPISWRKGIHYAKNEFFLDVIERVQYLMDFEKGVIRKNLIHGEIVCRCYLSGMPKLIKISLNKIL... 320  
*K\_lactis\_Apm 2-like* 172 LRTMTSAVSWRPKGIHYGKNEFFLDVIEKLEFIMDFEEGVRRNNVINGTIIICRSYLSGMPQLSIGLNKLM... 241  
*P\_sorbitophila\_Apm 2-like* 241 VRTGLSSINWRPKGIYFKNEIIFLDIVLELIDFDFDLGRNTIKKNEVKGFCAFSCYLSGMPVCRIGFNEEKLISLS 315  
*S\_stipitis\_Apm 2-like* 233 LRTYSSAIINWRKGIYFSKNEIIFLDITIEDCEFYDLELGVIKRNEVFGTCAVCKYLSGMPVCRIGFNEEKLISRI 307  
*D\_hansenii\_Apm 2-like* 232 LRATSSAIISWRPKGIYFKNEIIFLDIINCECFIFSLSTNSIKRNEVYGRCLVKCYLSGMPVCKLGFNEWYISG 306  
*S\_cerevisiae\_Apm 1* 239 LRTYSSAIINWRPKGIYAKNEIIFLDIIEDECFVYDLGTVIKKNEIYGTGVVKSYSLSGMPVCRIGFNERLSRI 312  
*K\_lactis\_Apm 1-like* 158 VALTNSVSWRPGEITHKKNEAFLDVIVESIINMLMT-QKSGVLRSEIIGDVKNSKLSGMPDLKLGINDKGI... 226  
*P\_sorbitophila\_Apm 1-like* 158 - TELTNSVSWRPGEIKYKNEAFLDVIESINMLMT-QDQVLRSEILGTVKVRSLSGMPDLKLGINDKGI... 226  
*D\_hansenii\_Apm 1-like* 158 - NAVTNSVNRSEGIYKKNKNEAFLDVVESINMLIS-ASGHVLRSEILGKIKIKSHLSGMPDLRGLNDKGI... 226  
*S\_stipitis\_Apm 1-like* 157 - NAVTNSVSWRKDGIYKKNKNEAFLDVVESINMLIN-ASGQVLRSEILGEVKIKSHLSGMPDLRGLNDKGI... 225  
*C\_albicans\_Apm 1* 157 - NALTNSVSWRKDGIYKKNKNEAFLDVIESINMLIT-ANGQVLRSEILGEIKIKSHLSGMPDLRGLNDKGI... 225  
*A\_thaliana\_Apm 1* 153 - MAVTNSVSWRSEGKLFKKNKNEVLDVIESVNILVN-SNGQIVRSQVVGALKMRTYLTGMPPECKLGLNDRIL... 221  
*A\_thaliana\_Apm 2* 153 - MAVTNSVSWRSEGQYKKNKNEVLDVIEVNILVN-SNGQIVRSQVVGALKMRTYLTGMPPECKLGLNDRVL... 221  
*C\_elegans\_apm-1* 149 - MAVTNSVSWRSEGIKYRKNKNEVLDVIESVNMLAN-AQGTVLRSEIVGSIIRFRVVLGMPPELRLGLNDKVF... 217  
*C\_elegans\_unc-101* 150 - MAVTNSVSWRSEGIKYRKNKNEVLDVIESVNMLAS-ANGTVLRSEIVGSIKMRVYLTGMPPELRLGLNDKVL... 218  
*D\_melanogaster\_AP-1au* 152 - VAVTNSVSWRSEGIKYRKNKNEVLDVIESVNMLAN-ANGNVLRSSEIVGAIKMRVYLTGMPPELRLGLNDKVL... 221  
*M\_musculus\_Ap 1m 1* 151 - ATVTNSVSWRSEGIKYRKNKNEVLDVIEAVNLLVS-ANGNVLRSSEIVGSIKMRVYLTGMPPELRLGLNDKVL... 219  
*H\_sapiens\_Ap 1m 1* 151 - ATVTNSVSWRSEGIKYRKNKNEVLDVIESVNLLVS-ANGNVLRSSEIVGSIKMRVYLTGMPPELRLGLNDKVL... 219  
*M\_musculus\_Ap 1m 2* 152 - TVTNSVSWRSEGIKYKKNKNEVLDVIESVNLLVS-ANGSVLLSEIVGTIKLVKFLSGMPPELRLGLNDRVL... 219  
*H\_sapiens\_Ap 1m 2* 152 - TVTNSVSWRSEGIKYKKNKNEVLDVIESVNLLVS-ANGSVLLSEIVGTIKLVKFLSGMPPELRLGLNDRVL... 219

*S\_cerevisiae\_Apm 2* 553 RDK.....LVNIDFETPYCTCSGLKNEVYKVEEPQLQYQSFPIVVRVKTVSDE..... 599  
*K\_lactis\_Apm 2-like* 445 ENQKEDVDKFAIAMSFEIPIYAVSGLKNEVFKIEEPQLNYQSFPIVVRVKTVDN..... 499  
*P\_sorbitophila\_Apm 2-like* 611 KQQYKNPSHYNIARATFLLPSLSYSGLKMTYIDVSEPOLKYSQCFPIIKVYTESKPHSSTDNRLSE 676  
*S\_stipitis\_Apm 2-like* 566 TKQWKIQNFDNDIKLKFSTPMLAYSGLRLNYSVVEDQLKYSQCFPIVVRVATESDPHKKTG-KGDNK 630  
*D\_hansenii\_Apm 2-like* 601 QKSIKFSQDFNHVKCSFNIPMLYSGLKLTLYKVAEQMKYTCFPIVVRVATESNSDTHSSNKVEDE 666  
*C\_albicans\_Apm 2* 593 SLKFKSSVFNDDIKKHFPLMVTYSGLKLSYLSVEEQMKYPCFPIVVRVLTKSIDHPSIALENG 648  
*S\_cerevisiae\_Apm 1* 426 .....VQIKFQIPYFTTSGIQVRYLKIINEPKLQKSYPIVVRVITQSGD..... 488  
*K\_lactis\_Apm 1-like* 395 .....VQIKFQIPYFTTSGIQVRYLKIIEEPKLOVNSYPIVVRVITQSGD..... 437  
*P\_sorbitophila\_Apm 1-like* 385 .....IKLNFSLPYFTTSGIQVRYLRIINEPKLQVQSYPIVVRVITQAGD..... 427  
*D\_hansenii\_Apm 1-like* 386 .....IKVNFSLPYFTTSGIQVRYLRIINEPKLQVQSYPIVVRVITQAGE..... 428  
*S\_stipitis\_Apm 1-like* 393 .....IKVNFSLPYFTTSGIQVRYLRIINEPKLQVQSYPIVVRVITQSGD..... 435  
*C\_albicans\_Apm 1* 389 .....IKVNFSLPYFTTSGIQVRYLRIINEPKLQVQSYPIVVRVITQSGD..... 431  
*A\_thaliana\_Ap 1m 1* 381 .....IRVKFEIPKFIVSGLQVRYLKIIE-KSGVQALPIVVRVITMAGE..... 422  
*A\_thaliana\_Ap 1m 2* 381 .....IRVKFEIPKFIVSGLQVRYLKIIE-KSGVQALPIVVRVITMAGE..... 422  
*C\_elegans\_apm-1* 379 .....INVKFEIPYFTTSGIQVRYLKIIE-KSGVQALPIVVRVITQNGD..... 420  
*C\_elegans\_unc-101* 375 .....IKVKFEIPYFTTSGIQVRYLKIIE-KSGVQALPIVVRVITQNGE..... 416  
*D\_melanogaster\_AP-1au* 379 .....IQVRFEPYFTTSGIQVRYLKIIE-KSGVQALPIVVRVITQNGD..... 420  
*M\_musculus\_Ap 1m 1* 376 .....ISVKFEIPYFTTSGIQVRYLKIIE-KSGVQALPIVVRVITQNGD..... 417  
*H\_sapiens\_Ap 1m 1* 376 .....ISVKFEIPYFTTSGIQVRYLKIIE-KSGVQALPIVVRVITQNGD..... 417  
*M\_musculus\_Ap 1m 2* 376 .....ISVKFEIPYFTTSGIQVRYLKIIE-KSGVQALPIVVRVITQSGD..... 417  
*H\_sapiens\_Ap 1m 2* 376 .....IGVKFEIPYFTTSGIQVRYLKIIE-KSGVQALPIVVRVITQSGD..... 417

B

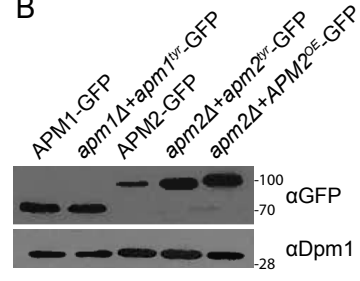

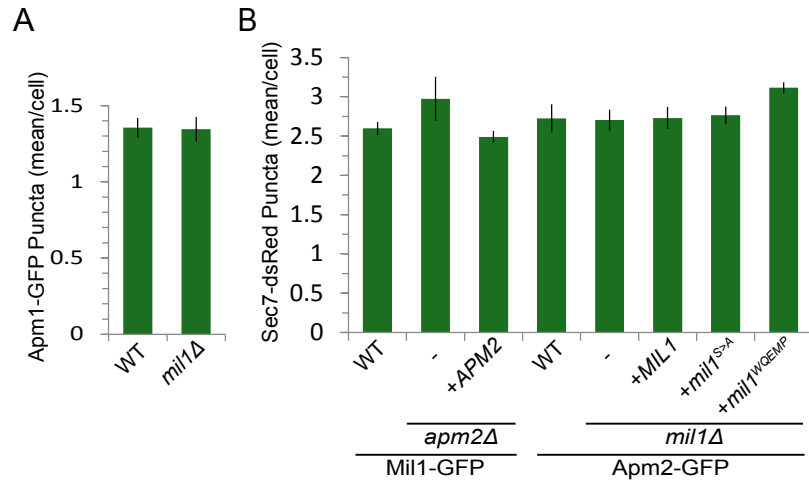

Supplement: supp_E15-09-0621v1_CombinedSupMats.pdf [file supp_E15-09-0621v1_CombinedSupMats.pdf]
